# Supplementary material
Source: PubMed Central journal article supplement (PMC5141278)

## Supplemental Figure Legends

**Figure S1. Analysis of three biological replicate preparations of released Caco-2 cell membrane glycans after infection with *S. Typhimurium* for 60 minutes.** Overlaid total compound chromatograms (TCCs) of each analysis are shown to demonstrate the inter-sample reproducibility.

**Figure S2. Global compositional profiling by relative abundances of glycan signals according to glycan type in uninfected (blue) vs. infected (red) cells.** Complex/hybrid (C/H) glycans were categorized by their decoration. Bar graphs show the relative abundances and line graphs show the number of compositions summed together for each type.

**Figure S3. Isomer separation and differentiation by PGC-LC/MS.** Extracted ion chromatogram shows two distinct isomers of an N-glycan structure  $m/z$  883.68 eluting at 23.3 min (*a*) and 25.6 min (*b*), respectively.

**Figure S4. Tandem mass spectra of identified N-glycans.** Precursor ions are indicated by a blue diamond. Putative structures are drawn above the glycan composition name.

**Figure S5. Effects on kifunensine concentration on cell surface glycosylation.** Distribution of high mannose structures on Caco-2 with increasing additions of kifunensine.

**Figure S1.**

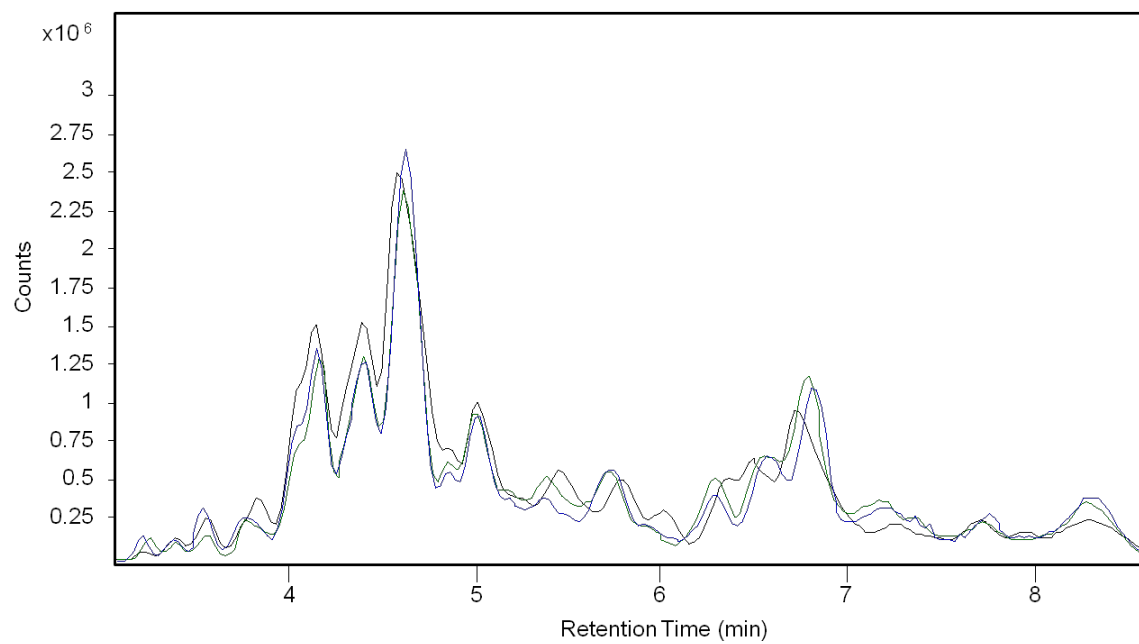

Figure S2.

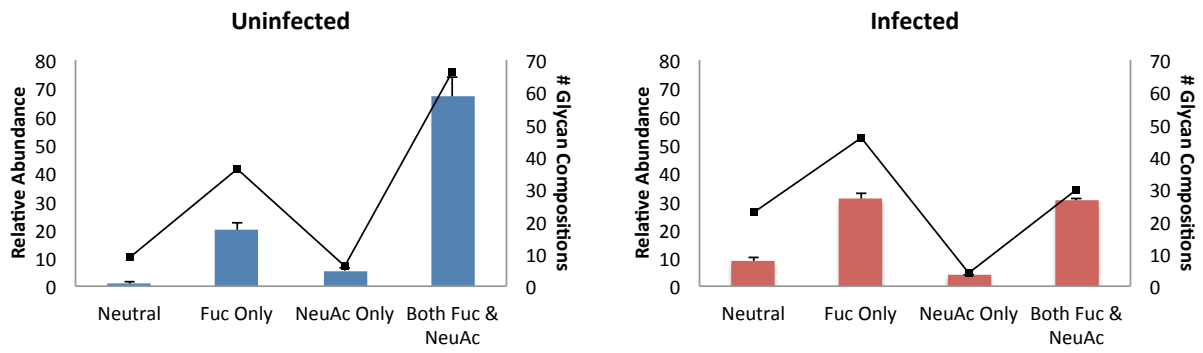

**Figure S3.**

Hex<sub>6</sub>HexNAc<sub>6</sub>Fuc<sub>1</sub>NeuAc<sub>1</sub>

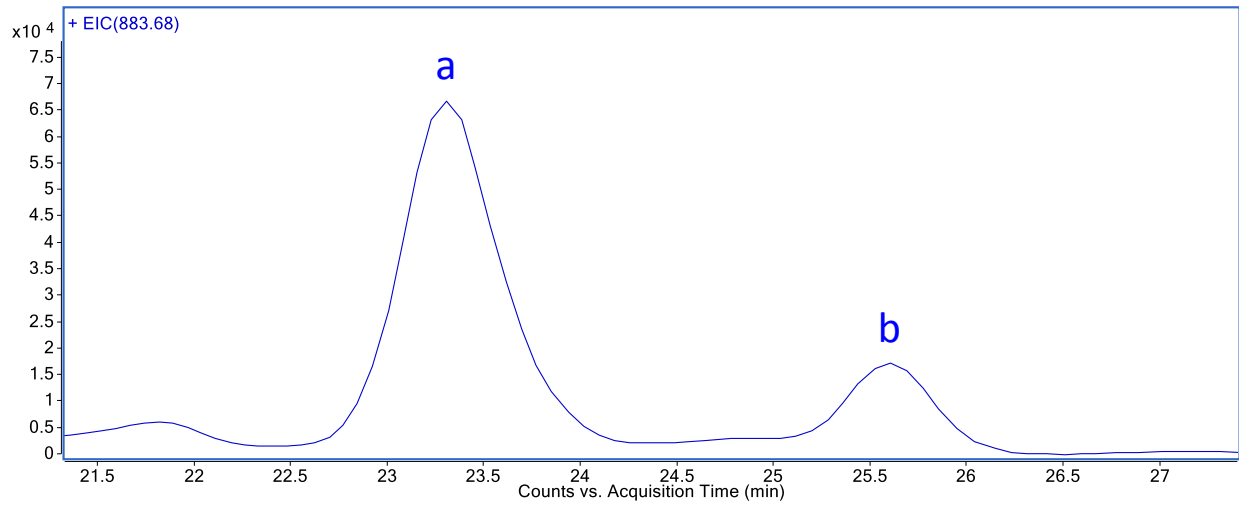

Figure S4.

A

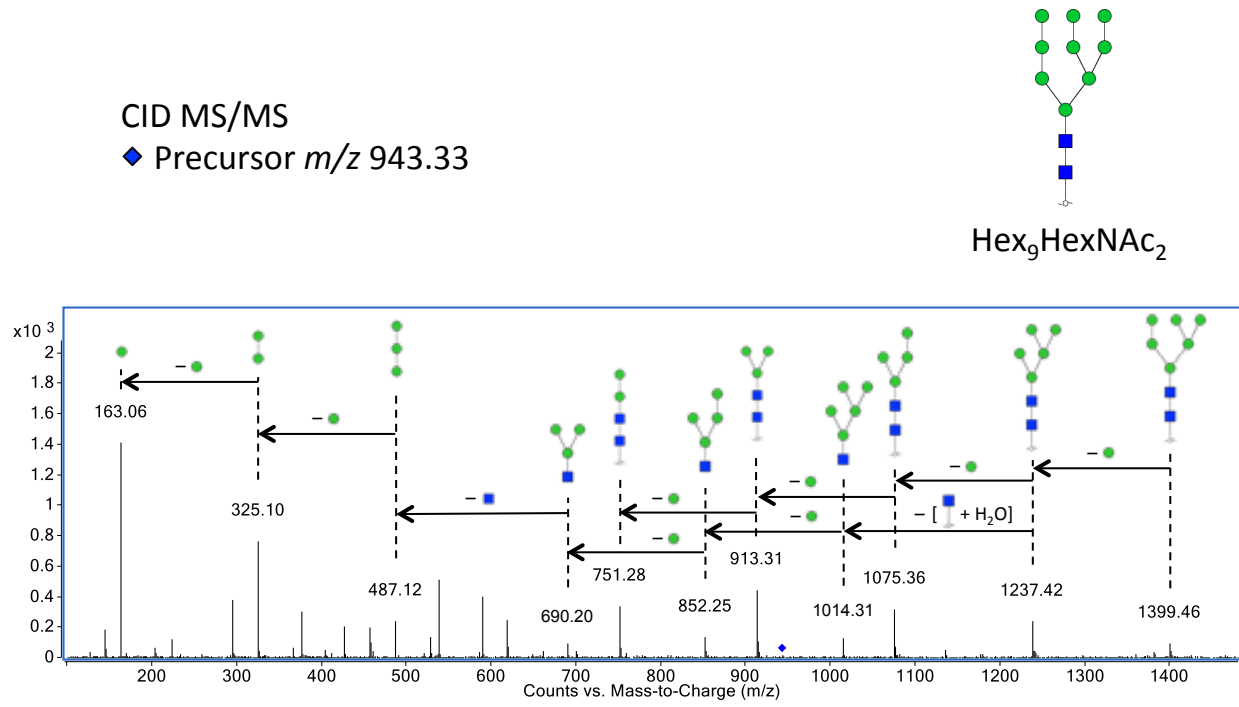

**B**

CID MS/MS

◆ Precursor  $m/z$  967.87

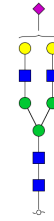

Hex<sub>5</sub>HexNAc<sub>4</sub>NeuAc<sub>1</sub>

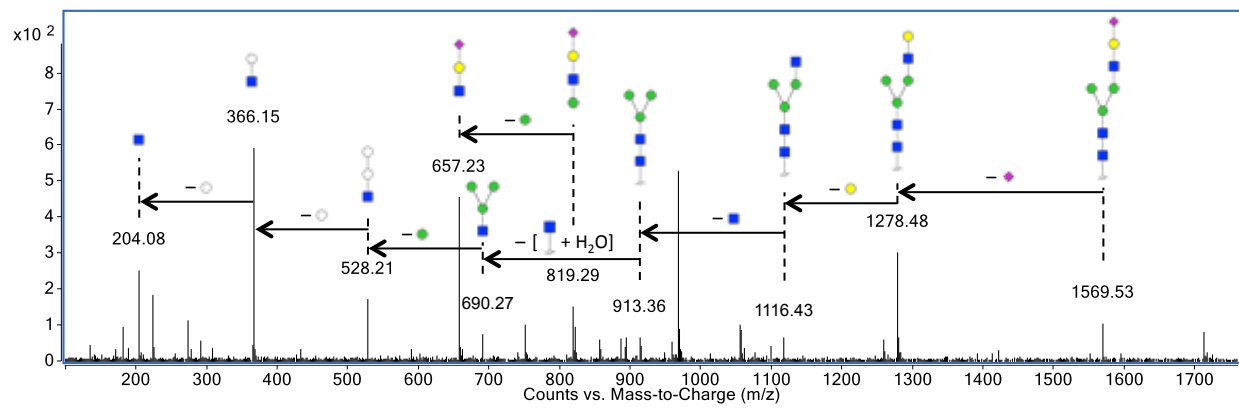

C

CID MS/MS  
◆ Precursor  $m/z$  786.64

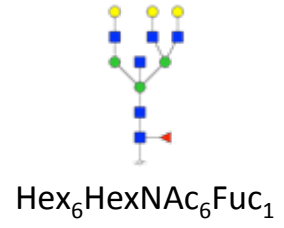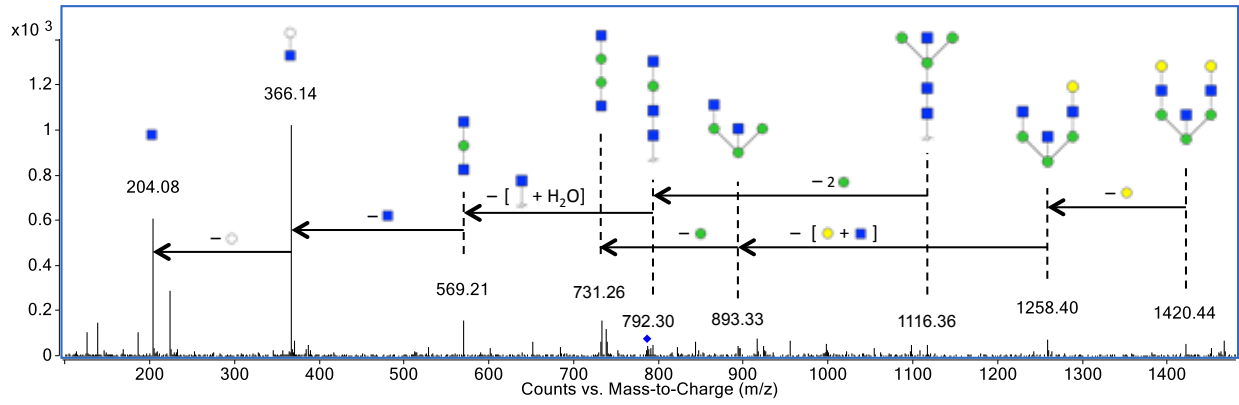

Figure S5.

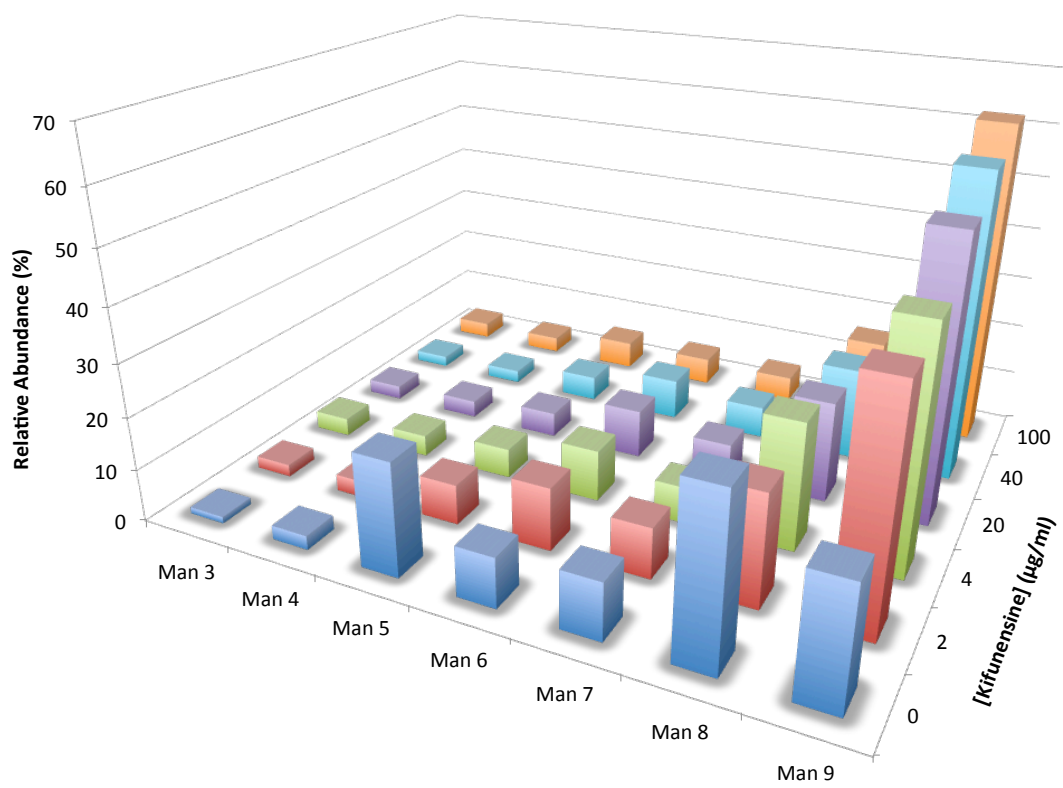

Supplement: 10.1074_M116.063206_mcp.M116.063206-1.pdf [file 10.1074_M116.063206_mcp.M116.063206-1.pdf]
