# Supplementary material
Source: PubMed Central journal article supplement (PMC5141278)
Supplement: 10.1074_M116.063206_mcp.M116.063206-3.pdf [file 10.1074_M116.063206_mcp.M116.063206-3.pdf]

**Table S2.** Exoglycosidase treatments of glycan fractions and their elucidated structures.

| Fraction # | Theoretical $m/z$ | Experimental $m/z$ | Mass Error (ppm) | Glycan Composition                                                             | Exoglycosidase                                                            | Relative Retention Time (min) | Structure |
|------------|-------------------|--------------------|------------------|--------------------------------------------------------------------------------|---------------------------------------------------------------------------|-------------------------------|-----------|
| 33         | 967.86            | 967.86             | 0.2              | Hex <sub>3</sub> HexNAc <sub>4</sub> Neu5Ac <sub>1</sub> + ol                  | --                                                                        | 0                             |           |
| 33a        | 822.31            | 822.31             | -2.2             | Hex <sub>3</sub> HexNAc <sub>4</sub> + ol                                      | $\alpha$ -2,3-sialidase                                                   | -4.81                         |           |
| 33b        | 785.29            | 785.29             | -4.9             | Hex <sub>3</sub> HexNAc <sub>3</sub> Neu5Ac <sub>1</sub> + ol                  | $\beta$ -1,4-galactosidase; $\beta$ -GlcNAcase; $\alpha$ -1,3-mannosidase | -1.79                         |           |
| 38         | 858.32            | 858.32             | -3.3             | Hex <sub>4</sub> HexNAc <sub>3</sub> Fuc <sub>1</sub> Neu5Ac <sub>1</sub> + ol | --                                                                        | 0                             |           |
| 38a        | 712.77            | 712.78             | 7.3              | Hex <sub>4</sub> HexNAc <sub>3</sub> Fuc <sub>1</sub> + ol                     | $\alpha$ -2,3-sialidase                                                   | -5.12                         |           |
| 38b        | 858.32            | 858.32             | -3.3             | Hex <sub>4</sub> HexNAc <sub>3</sub> Fuc <sub>1</sub> Neu5Ac <sub>1</sub> + ol | $\alpha$ -1,3-mannosidase                                                 | -0.45                         |           |
| 22         | 1142.43           | 1142.43            | 1.9              | Hex <sub>3</sub> HexNAc <sub>5</sub> Fuc <sub>1</sub> Neu5Ac <sub>1</sub> + ol | --                                                                        | 0                             |           |
| 22a        | 996.88            | 996.88             | -0.8             | Hex <sub>3</sub> HexNAc <sub>5</sub> Fuc <sub>1</sub> + ol                     | $\alpha$ -2,3-sialidase                                                   | -4.72                         |           |

|     |         |         |      |                                                                                |                   |       |  |
|-----|---------|---------|------|--------------------------------------------------------------------------------|-------------------|-------|--|
| 22b | 1142.43 | 1142.43 | 1.9  | Hex <sub>3</sub> HexNAc <sub>5</sub> Fuc <sub>1</sub> Neu5Ac <sub>1</sub> + ol | β-GlcNAcase       | 0.09  |  |
| 29  | 947.35  | 947.34  | -6.1 | Hex <sub>5</sub> HexNAc <sub>3</sub> Neu5Ac <sub>1</sub> + ol                  | --                | 0     |  |
| 29a | 801.80  | 801.80  | 1.5  | Hex <sub>6</sub> HexNAc <sub>3</sub> + ol                                      | α-2,3-sialidase   | -5.10 |  |
| 29c | 947.35  | 947.34  | -6.1 | Hex <sub>5</sub> HexNAc <sub>3</sub> Neu5Ac <sub>1</sub> + ol                  | α-1,3-mannosidase | -0.05 |  |
| 19  | 1215.46 | 1215.46 | 2.6  | Hex <sub>3</sub> HexNAc <sub>5</sub> Fuc <sub>2</sub> Neu5Ac <sub>1</sub> + ol | --                | 0     |  |
| 19a | 1069.91 | 1069.91 | 0.6  | Hex <sub>5</sub> HexNAc <sub>5</sub> Fuc <sub>2</sub> + ol                     | α-2,3-sialidase   | -5.12 |  |
| 19b | 1215.46 | 1215.45 | -5.6 | Hex <sub>3</sub> HexNAc <sub>5</sub> Fuc <sub>2</sub> Neu5Ac <sub>1</sub> + ol | β-GlcNAcase       | -0.06 |  |
| 18  | 1061.40 | 1061.40 | -1.6 | Hex <sub>4</sub> HexNAc <sub>5</sub> Fuc <sub>1</sub> Neu5Ac <sub>1</sub> + ol | --                | 0     |  |
| 18a | 915.85  | 915.85  | -4.3 | Hex <sub>4</sub> HexNAc <sub>5</sub> Fuc <sub>1</sub> + ol                     | α-2,3-sialidase   | -4.61 |  |

|     |         |         |      |                                                                                |                 |       |  |
|-----|---------|---------|------|--------------------------------------------------------------------------------|-----------------|-------|--|
| 18b | 1061.40 | 1061.40 | -1.6 | Hex <sub>2</sub> HexNAc <sub>5</sub> Fuc <sub>1</sub> Neu5Ac <sub>1</sub> + ol | β-GlcNAcase     | 0.02  |  |
| 11  | 1069.40 | 1069.40 | 0.8  | Hex <sub>5</sub> HexNAc <sub>3</sub> Neu5Ac <sub>1</sub> + ol                  | --              | 0     |  |
| 11a | 923.85  | 923.85  | -1.5 | Hex <sub>5</sub> HexNAc <sub>3</sub> + ol                                      | α-2,3-sialidase | -4.80 |  |
| 11b | 1069.40 | 1069.40 | 0.8  | Hex <sub>5</sub> HexNAc <sub>3</sub> Neu5Ac <sub>1</sub> + ol                  | β-GlcNAcase     | 0.02  |  |
