# Supplementary material
Source: PubMed Central journal article supplement (PMC5141278)
Supplement: 10.1074_M116.063206_mcp.M116.063206-4.pdf [file 10.1074_M116.063206_mcp.M116.063206-4.pdf]

**Table S3.** Identities of Caco-2 cell surface glycan compounds and their isomers. List is arranged by the glycan composition and grouped according to glycan class (N: nondecorated; F: fucosylated only; FS: fucosylated and sialylated; S: sialylated only; HM: high mannose).

| Theoretical<br><i>m/z</i> | Experimental<br><i>m/z</i> | Mass Error<br>(ppm) | Glycan Composition                   | Class | Retention<br>Time (min) |
|---------------------------|----------------------------|---------------------|--------------------------------------|-------|-------------------------|
| 1114.415                  | 1114.415                   | -0.3                | Hex <sub>3</sub> HexNac <sub>3</sub> | N     | 4.01                    |
| 1114.415                  | 1114.414                   | -1.3                | Hex <sub>3</sub> HexNac <sub>3</sub> | N     | 4.29                    |
| 1114.415                  | 1114.412                   | -2.7                | Hex <sub>3</sub> HexNac <sub>3</sub> | N     | 4.52                    |
| 1114.415                  | 1114.415                   | -0.2                | Hex <sub>3</sub> HexNac <sub>3</sub> | N     | 4.69                    |
| 1114.415                  | 1114.416                   | 1.2                 | Hex <sub>3</sub> HexNac <sub>3</sub> | N     | 5.22                    |
| 1114.415                  | 1114.414                   | -1.0                | Hex <sub>3</sub> HexNac <sub>3</sub> | N     | 6.02                    |
| 1114.415                  | 1114.416                   | 0.5                 | Hex <sub>3</sub> HexNac <sub>3</sub> | N     | 7.09                    |
| 659.251                   | 659.252                    | 1.1                 | Hex <sub>3</sub> HexNac <sub>4</sub> | N     | 4.20                    |
| 1317.494                  | 1317.491                   | -2.6                | Hex <sub>3</sub> HexNac <sub>4</sub> | N     | 4.46                    |
| 659.251                   | 659.252                    | 0.9                 | Hex <sub>3</sub> HexNac <sub>4</sub> | N     | 4.64                    |
| 659.251                   | 659.253                    | 2.9                 | Hex <sub>3</sub> HexNac <sub>4</sub> | N     | 4.89                    |
| 659.251                   | 659.254                    | 4.6                 | Hex <sub>3</sub> HexNac <sub>4</sub> | N     | 6.15                    |
| 760.791                   | 760.790                    | -1.3                | Hex <sub>3</sub> HexNac <sub>5</sub> | N     | 4.21                    |
| 760.791                   | 760.789                    | -2.3                | Hex <sub>3</sub> HexNac <sub>5</sub> | N     | 4.48                    |
| 638.738                   | 638.737                    | -1.4                | Hex <sub>4</sub> HexNac <sub>3</sub> | N     | 4.36                    |
| 1276.468                  | 1276.466                   | -1.2                | Hex <sub>4</sub> HexNac <sub>3</sub> | N     | 4.75                    |
| 1276.468                  | 1276.461                   | -5.6                | Hex <sub>4</sub> HexNac <sub>3</sub> | N     | 5.28                    |
| 638.738                   | 638.738                    | -0.1                | Hex <sub>4</sub> HexNac <sub>3</sub> | N     | 5.43                    |
| 1276.468                  | 1276.471                   | 2.3                 | Hex <sub>4</sub> HexNac <sub>3</sub> | N     | 6.47                    |
| 638.738                   | 638.744                    | 10.0                | Hex <sub>4</sub> HexNac <sub>3</sub> | N     | 8.11                    |
| 1479.547                  | 1479.543                   | -2.5                | Hex <sub>4</sub> HexNac <sub>4</sub> | N     | 4.03                    |
| 740.278                   | 740.277                    | -1.1                | Hex <sub>4</sub> HexNac <sub>4</sub> | N     | 4.40                    |
| 740.278                   | 740.278                    | 1.0                 | Hex <sub>4</sub> HexNac <sub>4</sub> | N     | 4.62                    |
| 740.278                   | 740.278                    | 0.7                 | Hex <sub>4</sub> HexNac <sub>4</sub> | N     | 4.91                    |
| 740.278                   | 740.279                    | 1.4                 | Hex <sub>4</sub> HexNac <sub>4</sub> | N     | 5.25                    |
| 740.278                   | 740.278                    | 0.5                 | Hex <sub>4</sub> HexNac <sub>4</sub> | N     | 5.38                    |
| 1479.547                  | 1479.551                   | 2.2                 | Hex <sub>4</sub> HexNac <sub>4</sub> | N     | 6.12                    |
| 740.278                   | 740.278                    | 0.8                 | Hex <sub>4</sub> HexNac <sub>4</sub> | N     | 6.38                    |
| 1479.547                  | 1479.559                   | 7.9                 | Hex <sub>4</sub> HexNac <sub>4</sub> | N     | 6.87                    |
| 841.817                   | 841.815                    | -3.0                | Hex <sub>4</sub> HexNac <sub>5</sub> | N     | 4.50                    |
| 841.817                   | 841.817                    | -0.4                | Hex <sub>4</sub> HexNac <sub>5</sub> | N     | 4.76                    |
| 841.817                   | 841.814                    | -3.3                | Hex <sub>4</sub> HexNac <sub>5</sub> | N     | 4.97                    |
| 841.817                   | 841.815                    | -3.0                | Hex <sub>4</sub> HexNac <sub>5</sub> | N     | 5.94                    |
| 841.817                   | 841.816                    | -1.3                | Hex <sub>4</sub> HexNac <sub>5</sub> | N     | 6.59                    |

|          |          |      |                                                       |   |      |
|----------|----------|------|-------------------------------------------------------|---|------|
| 841.817  | 841.821  | 4.9  | Hex <sub>4</sub> HexNAC <sub>5</sub>                  | N | 6.93 |
| 629.241  | 629.245  | 7.4  | Hex <sub>4</sub> HexNAC <sub>6</sub>                  | N | 4.12 |
| 629.241  | 629.242  | 1.6  | Hex <sub>4</sub> HexNAC <sub>6</sub>                  | N | 4.50 |
| 629.241  | 629.243  | 3.3  | Hex <sub>4</sub> HexNAC <sub>6</sub>                  | N | 5.21 |
| 629.241  | 629.246  | 9.3  | Hex <sub>4</sub> HexNAC <sub>6</sub>                  | N | 5.41 |
| 943.357  | 943.356  | -1.3 | Hex <sub>4</sub> HexNAC <sub>6</sub>                  | N | 7.63 |
| 719.764  | 719.763  | -1.4 | Hex <sub>5</sub> HexNAC <sub>3</sub>                  | N | 4.37 |
| 719.764  | 719.763  | -1.5 | Hex <sub>5</sub> HexNAC <sub>3</sub>                  | N | 5.06 |
| 1438.521 | 1438.520 | -0.6 | Hex <sub>5</sub> HexNAC <sub>3</sub>                  | N | 5.22 |
| 821.304  | 821.302  | -1.8 | Hex <sub>5</sub> HexNAC <sub>4</sub>                  | N | 4.36 |
| 821.304  | 821.303  | -0.6 | Hex <sub>5</sub> HexNAC <sub>4</sub>                  | N | 4.85 |
| 821.304  | 821.305  | 1.4  | Hex <sub>5</sub> HexNAC <sub>4</sub>                  | N | 5.24 |
| 821.304  | 821.304  | -0.4 | Hex <sub>5</sub> HexNAC <sub>4</sub>                  | N | 5.87 |
| 922.844  | 922.843  | -1.0 | Hex <sub>5</sub> HexNAC <sub>5</sub>                  | N | 4.03 |
| 922.844  | 922.844  | 0.2  | Hex <sub>5</sub> HexNAC <sub>5</sub>                  | N | 4.59 |
| 922.844  | 922.842  | -1.4 | Hex <sub>5</sub> HexNAC <sub>5</sub>                  | N | 4.91 |
| 922.844  | 922.840  | -4.3 | Hex <sub>5</sub> HexNAC <sub>5</sub>                  | N | 5.17 |
| 922.844  | 922.842  | -2.0 | Hex <sub>5</sub> HexNAC <sub>5</sub>                  | N | 5.68 |
| 922.844  | 922.844  | 0.4  | Hex <sub>5</sub> HexNAC <sub>5</sub>                  | N | 6.38 |
| 922.844  | 922.850  | 7.2  | Hex <sub>5</sub> HexNAC <sub>5</sub>                  | N | 6.86 |
| 922.844  | 922.848  | 4.4  | Hex <sub>5</sub> HexNAC <sub>5</sub>                  | N | 8.04 |
| 683.258  | 683.260  | 2.6  | Hex <sub>5</sub> HexNAC <sub>6</sub>                  | N | 4.22 |
| 683.258  | 683.258  | -0.3 | Hex <sub>5</sub> HexNAC <sub>6</sub>                  | N | 4.57 |
| 683.258  | 683.261  | 3.7  | Hex <sub>5</sub> HexNAC <sub>6</sub>                  | N | 5.27 |
| 683.258  | 683.260  | 2.8  | Hex <sub>5</sub> HexNAC <sub>6</sub>                  | N | 5.47 |
| 750.951  | 750.951  | -0.7 | Hex <sub>5</sub> HexNAC <sub>7</sub>                  | N | 4.52 |
| 750.951  | 750.950  | -2.3 | Hex <sub>5</sub> HexNAC <sub>7</sub>                  | N | 4.99 |
| 800.791  | 800.787  | -4.2 | Hex <sub>6</sub> HexNAC <sub>3</sub>                  | N | 4.12 |
| 800.791  | 800.791  | 0.1  | Hex <sub>6</sub> HexNAC <sub>3</sub>                  | N | 4.62 |
| 800.791  | 800.789  | -1.7 | Hex <sub>6</sub> HexNAC <sub>3</sub>                  | N | 4.87 |
| 800.791  | 800.791  | 0.5  | Hex <sub>6</sub> HexNAC <sub>3</sub>                  | N | 5.57 |
| 902.330  | 902.330  | -0.4 | Hex <sub>6</sub> HexNAC <sub>4</sub>                  | N | 3.99 |
| 902.330  | 902.329  | -1.3 | Hex <sub>6</sub> HexNAC <sub>4</sub>                  | N | 4.19 |
| 902.330  | 902.332  | 1.6  | Hex <sub>6</sub> HexNAC <sub>4</sub>                  | N | 4.64 |
| 737.276  | 737.277  | 1.2  | Hex <sub>6</sub> HexNAC <sub>6</sub>                  | N | 4.33 |
| 737.276  | 737.277  | 1.8  | Hex <sub>6</sub> HexNAC <sub>6</sub>                  | N | 4.67 |
| 737.276  | 737.280  | 6.4  | Hex <sub>6</sub> HexNAC <sub>6</sub>                  | N | 5.36 |
| 737.276  | 737.282  | 8.4  | Hex <sub>6</sub> HexNAC <sub>6</sub>                  | N | 5.57 |
| 1260.473 | 1260.473 | 0.3  | Hex <sub>3</sub> HexNAC <sub>3</sub> Fuc <sub>1</sub> | F | 4.25 |
| 1260.473 | 1260.469 | -3.3 | Hex <sub>3</sub> HexNAC <sub>3</sub> Fuc <sub>1</sub> | F | 4.50 |

|          |          |      |                                                       |   |      |
|----------|----------|------|-------------------------------------------------------|---|------|
| 630.740  | 630.741  | 0.6  | Hex <sub>3</sub> HexNAc <sub>3</sub> Fuc <sub>1</sub> | F | 5.13 |
| 630.740  | 630.741  | 0.2  | Hex <sub>3</sub> HexNAc <sub>3</sub> Fuc <sub>1</sub> | F | 6.00 |
| 630.740  | 630.744  | 6.0  | Hex <sub>3</sub> HexNAc <sub>3</sub> Fuc <sub>1</sub> | F | 6.68 |
| 1260.473 | 1260.479 | 4.7  | Hex <sub>3</sub> HexNAc <sub>3</sub> Fuc <sub>1</sub> | F | 6.98 |
| 630.740  | 630.737  | -5.1 | Hex <sub>3</sub> HexNAc <sub>3</sub> Fuc <sub>1</sub> | F | 7.75 |
| 630.740  | 630.742  | 1.9  | Hex <sub>3</sub> HexNAc <sub>3</sub> Fuc <sub>1</sub> | F | 8.21 |
| 732.280  | 732.282  | 1.9  | Hex <sub>3</sub> HexNAc <sub>4</sub> Fuc <sub>1</sub> | F | 4.05 |
| 1463.552 | 1463.551 | -1.0 | Hex <sub>3</sub> HexNAc <sub>4</sub> Fuc <sub>1</sub> | F | 4.22 |
| 732.280  | 732.279  | -1.1 | Hex <sub>3</sub> HexNAc <sub>4</sub> Fuc <sub>1</sub> | F | 4.42 |
| 732.280  | 732.279  | -1.8 | Hex <sub>3</sub> HexNAc <sub>4</sub> Fuc <sub>1</sub> | F | 5.21 |
| 732.280  | 732.279  | -1.9 | Hex <sub>3</sub> HexNAc <sub>4</sub> Fuc <sub>1</sub> | F | 5.79 |
| 732.280  | 732.280  | 0.1  | Hex <sub>3</sub> HexNAc <sub>4</sub> Fuc <sub>1</sub> | F | 6.01 |
| 1463.552 | 1463.550 | -1.6 | Hex <sub>3</sub> HexNAc <sub>4</sub> Fuc <sub>1</sub> | F | 6.32 |
| 732.280  | 732.286  | 7.5  | Hex <sub>3</sub> HexNAc <sub>4</sub> Fuc <sub>1</sub> | F | 6.97 |
| 732.280  | 732.280  | -0.1 | Hex <sub>3</sub> HexNAc <sub>4</sub> Fuc <sub>1</sub> | F | 7.26 |
| 732.280  | 732.281  | 0.5  | Hex <sub>3</sub> HexNAc <sub>4</sub> Fuc <sub>1</sub> | F | 8.03 |
| 833.820  | 833.819  | -0.5 | Hex <sub>3</sub> HexNAc <sub>5</sub> Fuc <sub>1</sub> | F | 4.22 |
| 833.820  | 833.818  | -2.6 | Hex <sub>3</sub> HexNAc <sub>5</sub> Fuc <sub>1</sub> | F | 4.51 |
| 833.820  | 833.817  | -3.0 | Hex <sub>3</sub> HexNAc <sub>5</sub> Fuc <sub>1</sub> | F | 4.92 |
| 833.820  | 833.823  | 4.1  | Hex <sub>3</sub> HexNAc <sub>5</sub> Fuc <sub>1</sub> | F | 5.67 |
| 833.820  | 833.818  | -2.4 | Hex <sub>3</sub> HexNAc <sub>5</sub> Fuc <sub>1</sub> | F | 5.84 |
| 833.820  | 833.815  | -5.4 | Hex <sub>3</sub> HexNAc <sub>5</sub> Fuc <sub>1</sub> | F | 6.36 |
| 833.820  | 833.818  | -2.3 | Hex <sub>3</sub> HexNAc <sub>5</sub> Fuc <sub>1</sub> | F | 7.28 |
| 935.360  | 935.353  | -7.2 | Hex <sub>3</sub> HexNAc <sub>6</sub> Fuc <sub>1</sub> | F | 4.17 |
| 935.360  | 935.359  | -0.7 | Hex <sub>3</sub> HexNAc <sub>6</sub> Fuc <sub>1</sub> | F | 4.34 |
| 935.360  | 935.358  | -1.8 | Hex <sub>3</sub> HexNAc <sub>6</sub> Fuc <sub>1</sub> | F | 4.52 |
| 935.360  | 935.358  | -1.9 | Hex <sub>3</sub> HexNAc <sub>6</sub> Fuc <sub>1</sub> | F | 4.81 |
| 935.360  | 935.359  | -0.9 | Hex <sub>3</sub> HexNAc <sub>6</sub> Fuc <sub>1</sub> | F | 5.74 |
| 935.360  | 935.358  | -1.6 | Hex <sub>3</sub> HexNAc <sub>6</sub> Fuc <sub>1</sub> | F | 6.29 |
| 1081.417 | 1081.414 | -3.4 | Hex <sub>3</sub> HexNAc <sub>6</sub> Fuc <sub>3</sub> | F | 5.45 |
| 1081.417 | 1081.414 | -2.9 | Hex <sub>3</sub> HexNAc <sub>6</sub> Fuc <sub>3</sub> | F | 6.21 |
| 691.602  | 691.602  | -0.7 | Hex <sub>3</sub> HexNAc <sub>7</sub> Fuc <sub>1</sub> | F | 4.39 |
| 691.602  | 691.602  | 0.4  | Hex <sub>3</sub> HexNAc <sub>7</sub> Fuc <sub>1</sub> | F | 4.56 |
| 711.767  | 711.770  | 4.3  | Hex <sub>4</sub> HexNAc <sub>3</sub> Fuc <sub>1</sub> | F | 5.09 |
| 711.767  | 711.766  | -1.2 | Hex <sub>4</sub> HexNAc <sub>3</sub> Fuc <sub>1</sub> | F | 5.35 |
| 1422.526 | 1422.525 | -0.2 | Hex <sub>4</sub> HexNAc <sub>3</sub> Fuc <sub>1</sub> | F | 5.62 |
| 711.767  | 711.771  | 6.6  | Hex <sub>4</sub> HexNAc <sub>3</sub> Fuc <sub>1</sub> | F | 6.60 |
| 711.767  | 711.773  | 8.1  | Hex <sub>4</sub> HexNAc <sub>3</sub> Fuc <sub>1</sub> | F | 7.04 |
| 711.767  | 711.764  | -4.5 | Hex <sub>4</sub> HexNAc <sub>3</sub> Fuc <sub>1</sub> | F | 8.12 |
| 813.306  | 813.305  | -2.4 | Hex <sub>4</sub> HexNAc <sub>4</sub> Fuc <sub>1</sub> | F | 4.21 |

|          |          |      |                                                       |   |      |
|----------|----------|------|-------------------------------------------------------|---|------|
| 813.306  | 813.305  | -1.7 | Hex <sub>4</sub> HexNAc <sub>4</sub> Fuc <sub>1</sub> | F | 4.48 |
| 813.306  | 813.306  | -0.5 | Hex <sub>4</sub> HexNAc <sub>4</sub> Fuc <sub>1</sub> | F | 4.83 |
| 813.306  | 813.307  | 0.5  | Hex <sub>4</sub> HexNAc <sub>4</sub> Fuc <sub>1</sub> | F | 5.23 |
| 813.306  | 813.306  | -1.2 | Hex <sub>4</sub> HexNAc <sub>4</sub> Fuc <sub>1</sub> | F | 5.47 |
| 813.306  | 813.308  | 2.1  | Hex <sub>4</sub> HexNAc <sub>4</sub> Fuc <sub>1</sub> | F | 5.70 |
| 813.306  | 813.305  | -2.2 | Hex <sub>4</sub> HexNAc <sub>4</sub> Fuc <sub>1</sub> | F | 6.38 |
| 1625.605 | 1625.599 | -3.7 | Hex <sub>4</sub> HexNAc <sub>4</sub> Fuc <sub>1</sub> | F | 6.62 |
| 813.306  | 813.314  | 9.0  | Hex <sub>4</sub> HexNAc <sub>4</sub> Fuc <sub>1</sub> | F | 6.94 |
| 914.846  | 914.845  | -1.4 | Hex <sub>4</sub> HexNAc <sub>5</sub> Fuc <sub>1</sub> | F | 4.43 |
| 914.846  | 914.846  | -0.4 | Hex <sub>4</sub> HexNAc <sub>5</sub> Fuc <sub>1</sub> | F | 4.65 |
| 914.846  | 914.845  | -0.8 | Hex <sub>4</sub> HexNAc <sub>5</sub> Fuc <sub>1</sub> | F | 4.94 |
| 914.846  | 914.846  | -0.7 | Hex <sub>4</sub> HexNAc <sub>5</sub> Fuc <sub>1</sub> | F | 5.00 |
| 914.846  | 914.842  | -4.2 | Hex <sub>4</sub> HexNAc <sub>5</sub> Fuc <sub>1</sub> | F | 5.43 |
| 914.846  | 914.840  | -6.3 | Hex <sub>4</sub> HexNAc <sub>5</sub> Fuc <sub>1</sub> | F | 6.47 |
| 914.846  | 914.850  | 4.2  | Hex <sub>4</sub> HexNAc <sub>5</sub> Fuc <sub>1</sub> | F | 6.70 |
| 914.846  | 914.847  | 1.0  | Hex <sub>4</sub> HexNAc <sub>5</sub> Fuc <sub>1</sub> | F | 6.78 |
| 914.846  | 914.852  | 6.4  | Hex <sub>4</sub> HexNAc <sub>5</sub> Fuc <sub>1</sub> | F | 7.02 |
| 987.875  | 987.873  | -1.9 | Hex <sub>4</sub> HexNAc <sub>5</sub> Fuc <sub>2</sub> | F | 4.31 |
| 987.875  | 987.874  | -0.8 | Hex <sub>4</sub> HexNAc <sub>5</sub> Fuc <sub>2</sub> | F | 4.56 |
| 987.875  | 987.873  | -2.2 | Hex <sub>4</sub> HexNAc <sub>5</sub> Fuc <sub>2</sub> | F | 4.93 |
| 987.875  | 987.874  | -1.3 | Hex <sub>4</sub> HexNAc <sub>5</sub> Fuc <sub>2</sub> | F | 5.24 |
| 987.875  | 987.877  | 2.1  | Hex <sub>4</sub> HexNAc <sub>5</sub> Fuc <sub>2</sub> | F | 5.65 |
| 1016.386 | 1016.378 | -7.6 | Hex <sub>4</sub> HexNAc <sub>6</sub> Fuc <sub>1</sub> | F | 4.58 |
| 1016.386 | 1016.385 | -1.0 | Hex <sub>4</sub> HexNAc <sub>6</sub> Fuc <sub>1</sub> | F | 4.97 |
| 1016.386 | 1016.384 | -1.9 | Hex <sub>4</sub> HexNAc <sub>6</sub> Fuc <sub>1</sub> | F | 5.20 |
| 677.927  | 677.926  | -0.1 | Hex <sub>4</sub> HexNAc <sub>6</sub> Fuc <sub>1</sub> | F | 5.40 |
| 1016.386 | 1016.381 | -4.8 | Hex <sub>4</sub> HexNAc <sub>6</sub> Fuc <sub>1</sub> | F | 5.90 |
| 1016.386 | 1016.384 | -1.7 | Hex <sub>4</sub> HexNAc <sub>6</sub> Fuc <sub>1</sub> | F | 6.69 |
| 1089.415 | 1089.411 | -3.1 | Hex <sub>4</sub> HexNAc <sub>6</sub> Fuc <sub>2</sub> | F | 4.75 |
| 1089.415 | 1089.413 | -1.7 | Hex <sub>4</sub> HexNAc <sub>6</sub> Fuc <sub>2</sub> | F | 5.03 |
| 726.613  | 726.609  | -4.8 | Hex <sub>4</sub> HexNAc <sub>6</sub> Fuc <sub>2</sub> | F | 5.76 |
| 726.613  | 726.612  | -0.1 | Hex <sub>4</sub> HexNAc <sub>6</sub> Fuc <sub>2</sub> | F | 6.68 |
| 745.620  | 745.615  | -6.3 | Hex <sub>4</sub> HexNAc <sub>7</sub> Fuc <sub>1</sub> | F | 4.55 |
| 745.620  | 745.619  | -0.8 | Hex <sub>4</sub> HexNAc <sub>7</sub> Fuc <sub>1</sub> | F | 5.18 |
| 745.620  | 745.622  | 3.0  | Hex <sub>4</sub> HexNAc <sub>7</sub> Fuc <sub>1</sub> | F | 5.70 |
| 894.333  | 894.332  | -1.5 | Hex <sub>5</sub> HexNAc <sub>4</sub> Fuc <sub>1</sub> | F | 4.34 |
| 894.333  | 894.330  | -2.9 | Hex <sub>5</sub> HexNAc <sub>4</sub> Fuc <sub>1</sub> | F | 4.66 |
| 894.333  | 894.331  | -2.2 | Hex <sub>5</sub> HexNAc <sub>4</sub> Fuc <sub>1</sub> | F | 4.84 |
| 894.333  | 894.334  | 1.0  | Hex <sub>5</sub> HexNAc <sub>4</sub> Fuc <sub>1</sub> | F | 5.24 |
| 894.333  | 894.332  | -0.5 | Hex <sub>5</sub> HexNAc <sub>4</sub> Fuc <sub>1</sub> | F | 5.98 |

|          |          |      |                                                       |   |      |
|----------|----------|------|-------------------------------------------------------|---|------|
| 894.333  | 894.335  | 2.6  | Hex <sub>5</sub> HexNAc <sub>4</sub> Fuc <sub>1</sub> | F | 6.90 |
| 894.333  | 894.332  | -1.4 | Hex <sub>5</sub> HexNAc <sub>4</sub> Fuc <sub>1</sub> | F | 8.09 |
| 995.873  | 995.873  | 0.4  | Hex <sub>5</sub> HexNAc <sub>5</sub> Fuc <sub>1</sub> | F | 4.59 |
| 995.873  | 995.872  | -0.8 | Hex <sub>5</sub> HexNAc <sub>5</sub> Fuc <sub>1</sub> | F | 4.91 |
| 664.251  | 664.258  | 9.8  | Hex <sub>5</sub> HexNAc <sub>5</sub> Fuc <sub>1</sub> | F | 5.17 |
| 995.873  | 995.872  | -0.3 | Hex <sub>5</sub> HexNAc <sub>5</sub> Fuc <sub>1</sub> | F | 5.30 |
| 995.873  | 995.870  | -2.7 | Hex <sub>5</sub> HexNAc <sub>5</sub> Fuc <sub>1</sub> | F | 5.41 |
| 995.873  | 995.879  | 6.8  | Hex <sub>5</sub> HexNAc <sub>5</sub> Fuc <sub>1</sub> | F | 5.66 |
| 664.251  | 664.252  | 1.2  | Hex <sub>5</sub> HexNAc <sub>5</sub> Fuc <sub>1</sub> | F | 5.86 |
| 664.251  | 664.256  | 7.0  | Hex <sub>5</sub> HexNAc <sub>5</sub> Fuc <sub>1</sub> | F | 6.04 |
| 995.873  | 995.879  | 6.2  | Hex <sub>5</sub> HexNAc <sub>5</sub> Fuc <sub>1</sub> | F | 6.46 |
| 995.873  | 995.879  | 6.7  | Hex <sub>5</sub> HexNAc <sub>5</sub> Fuc <sub>1</sub> | F | 6.86 |
| 995.873  | 995.865  | -7.7 | Hex <sub>5</sub> HexNAc <sub>5</sub> Fuc <sub>1</sub> | F | 8.43 |
| 731.944  | 731.943  | -1.0 | Hex <sub>5</sub> HexNAc <sub>6</sub> Fuc <sub>1</sub> | F | 5.27 |
| 731.944  | 731.943  | -1.2 | Hex <sub>5</sub> HexNAc <sub>6</sub> Fuc <sub>1</sub> | F | 5.47 |
| 731.944  | 731.942  | -2.3 | Hex <sub>5</sub> HexNAc <sub>6</sub> Fuc <sub>1</sub> | F | 5.88 |
| 1097.412 | 1097.409 | -3.0 | Hex <sub>5</sub> HexNAc <sub>6</sub> Fuc <sub>1</sub> | F | 6.20 |
| 731.944  | 731.945  | 0.7  | Hex <sub>5</sub> HexNAc <sub>6</sub> Fuc <sub>1</sub> | F | 6.71 |
| 1097.412 | 1097.405 | -6.8 | Hex <sub>5</sub> HexNAc <sub>6</sub> Fuc <sub>1</sub> | F | 8.37 |
| 1170.441 | 1170.440 | -1.0 | Hex <sub>5</sub> HexNAc <sub>6</sub> Fuc <sub>2</sub> | F | 5.46 |
| 1170.441 | 1170.450 | 7.5  | Hex <sub>5</sub> HexNAc <sub>6</sub> Fuc <sub>2</sub> | F | 5.62 |
| 780.630  | 780.628  | -2.4 | Hex <sub>5</sub> HexNAc <sub>6</sub> Fuc <sub>2</sub> | F | 5.88 |
| 780.630  | 780.627  | -3.4 | Hex <sub>5</sub> HexNAc <sub>6</sub> Fuc <sub>2</sub> | F | 6.86 |
| 799.637  | 799.637  | -0.8 | Hex <sub>5</sub> HexNAc <sub>7</sub> Fuc <sub>1</sub> | F | 5.26 |
| 1198.952 | 1198.954 | 1.9  | Hex <sub>5</sub> HexNAc <sub>7</sub> Fuc <sub>1</sub> | F | 5.43 |
| 799.637  | 799.636  | -1.0 | Hex <sub>5</sub> HexNAc <sub>7</sub> Fuc <sub>1</sub> | F | 5.69 |
| 799.637  | 799.635  | -2.9 | Hex <sub>5</sub> HexNAc <sub>7</sub> Fuc <sub>1</sub> | F | 6.22 |
| 799.637  | 799.637  | -0.3 | Hex <sub>5</sub> HexNAc <sub>7</sub> Fuc <sub>1</sub> | F | 6.78 |
| 848.323  | 848.323  | -0.1 | Hex <sub>5</sub> HexNAc <sub>7</sub> Fuc <sub>2</sub> | F | 5.31 |
| 848.323  | 848.323  | -0.5 | Hex <sub>5</sub> HexNAc <sub>7</sub> Fuc <sub>2</sub> | F | 6.04 |
| 848.323  | 848.320  | -3.3 | Hex <sub>5</sub> HexNAc <sub>7</sub> Fuc <sub>2</sub> | F | 6.36 |
| 848.323  | 848.326  | 3.8  | Hex <sub>5</sub> HexNAc <sub>7</sub> Fuc <sub>2</sub> | F | 6.82 |
| 785.962  | 785.961  | -1.4 | Hex <sub>6</sub> HexNAc <sub>6</sub> Fuc <sub>1</sub> | F | 5.37 |
| 785.962  | 785.962  | 0.2  | Hex <sub>6</sub> HexNAc <sub>6</sub> Fuc <sub>1</sub> | F | 5.58 |
| 785.962  | 785.955  | -8.5 | Hex <sub>6</sub> HexNAc <sub>6</sub> Fuc <sub>1</sub> | F | 5.96 |
| 785.962  | 785.958  | -4.7 | Hex <sub>6</sub> HexNAc <sub>6</sub> Fuc <sub>1</sub> | F | 6.43 |
| 785.962  | 785.964  | 3.5  | Hex <sub>6</sub> HexNAc <sub>6</sub> Fuc <sub>1</sub> | F | 6.77 |
| 785.962  | 785.954  | -9.3 | Hex <sub>6</sub> HexNAc <sub>6</sub> Fuc <sub>1</sub> | F | 8.04 |
| 1178.439 | 1178.433 | -4.7 | Hex <sub>6</sub> HexNAc <sub>6</sub> Fuc <sub>1</sub> | F | 8.58 |
| 834.648  | 834.647  | -1.1 | Hex <sub>6</sub> HexNAc <sub>6</sub> Fuc <sub>2</sub> | F | 5.33 |

|          |          |      |                                                                           |    |       |
|----------|----------|------|---------------------------------------------------------------------------|----|-------|
| 1251.468 | 1251.474 | 4.8  | Hex <sub>6</sub> HexNAC <sub>6</sub> Fuc <sub>2</sub>                     | F  | 5.62  |
| 834.648  | 834.646  | -1.8 | Hex <sub>6</sub> HexNAC <sub>6</sub> Fuc <sub>2</sub>                     | F  | 6.00  |
| 834.648  | 834.649  | 1.7  | Hex <sub>6</sub> HexNAC <sub>6</sub> Fuc <sub>2</sub>                     | F  | 6.76  |
| 834.648  | 834.643  | -6.2 | Hex <sub>6</sub> HexNAC <sub>6</sub> Fuc <sub>2</sub>                     | F  | 7.36  |
| 834.648  | 834.643  | -5.8 | Hex <sub>6</sub> HexNAC <sub>6</sub> Fuc <sub>2</sub>                     | F  | 7.66  |
| 853.655  | 853.653  | -1.8 | Hex <sub>6</sub> HexNAC <sub>7</sub> Fuc <sub>1</sub>                     | F  | 5.49  |
| 853.655  | 853.653  | -1.6 | Hex <sub>6</sub> HexNAC <sub>7</sub> Fuc <sub>1</sub>                     | F  | 5.77  |
| 853.655  | 853.655  | -0.1 | Hex <sub>6</sub> HexNAC <sub>7</sub> Fuc <sub>1</sub>                     | F  | 6.22  |
| 853.655  | 853.658  | 3.6  | Hex <sub>6</sub> HexNAC <sub>7</sub> Fuc <sub>1</sub>                     | F  | 6.85  |
| 1279.978 | 1279.969 | -7.7 | Hex <sub>6</sub> HexNAC <sub>7</sub> Fuc <sub>1</sub>                     | F  | 7.60  |
| 853.655  | 853.647  | -9.0 | Hex <sub>6</sub> HexNAC <sub>7</sub> Fuc <sub>1</sub>                     | F  | 8.59  |
| 902.341  | 902.340  | -1.2 | Hex <sub>6</sub> HexNAC <sub>7</sub> Fuc <sub>2</sub>                     | F  | 6.14  |
| 902.341  | 902.337  | -4.3 | Hex <sub>6</sub> HexNAC <sub>7</sub> Fuc <sub>2</sub>                     | F  | 6.38  |
| 902.341  | 902.345  | 4.2  | Hex <sub>6</sub> HexNAC <sub>7</sub> Fuc <sub>2</sub>                     | F  | 6.87  |
| 951.027  | 951.022  | -5.2 | Hex <sub>6</sub> HexNAC <sub>7</sub> Fuc <sub>3</sub>                     | F  | 6.40  |
| 951.027  | 951.029  | 2.2  | Hex <sub>6</sub> HexNAC <sub>7</sub> Fuc <sub>3</sub>                     | F  | 6.81  |
| 951.027  | 951.022  | -4.7 | Hex <sub>6</sub> HexNAC <sub>7</sub> Fuc <sub>3</sub>                     | F  | 10.35 |
| 907.672  | 907.670  | -3.2 | Hex <sub>7</sub> HexNAC <sub>7</sub> Fuc <sub>1</sub>                     | F  | 5.86  |
| 907.672  | 907.673  | 0.2  | Hex <sub>7</sub> HexNAC <sub>7</sub> Fuc <sub>1</sub>                     | F  | 6.73  |
| 907.672  | 907.679  | 7.1  | Hex <sub>7</sub> HexNAC <sub>7</sub> Fuc <sub>1</sub>                     | F  | 6.88  |
| 1434.034 | 1434.030 | -2.7 | Hex <sub>7</sub> HexNAC <sub>7</sub> Fuc <sub>2</sub>                     | F  | 5.67  |
| 956.358  | 956.356  | -2.2 | Hex <sub>7</sub> HexNAC <sub>7</sub> Fuc <sub>2</sub>                     | F  | 5.96  |
| 956.358  | 956.358  | -0.6 | Hex <sub>7</sub> HexNAC <sub>7</sub> Fuc <sub>2</sub>                     | F  | 6.29  |
| 956.358  | 956.365  | 6.7  | Hex <sub>7</sub> HexNAC <sub>7</sub> Fuc <sub>2</sub>                     | F  | 6.95  |
| 1005.044 | 1005.049 | 4.4  | Hex <sub>7</sub> HexNAC <sub>7</sub> Fuc <sub>3</sub>                     | F  | 6.87  |
| 1005.044 | 1005.043 | -1.8 | Hex <sub>7</sub> HexNAC <sub>7</sub> Fuc <sub>3</sub>                     | F  | 7.92  |
| 857.315  | 857.316  | 2.2  | Hex <sub>4</sub> HexNAC <sub>3</sub> Fuc <sub>1</sub> Neu5Ac <sub>1</sub> | FS | 8.46  |
| 857.315  | 857.316  | 1.2  | Hex <sub>4</sub> HexNAC <sub>3</sub> Fuc <sub>1</sub> Neu5Ac <sub>1</sub> | FS | 9.34  |
| 857.315  | 857.312  | -2.6 | Hex <sub>4</sub> HexNAC <sub>3</sub> Fuc <sub>1</sub> Neu5Ac <sub>1</sub> | FS | 10.46 |
| 958.854  | 958.849  | -5.3 | Hex <sub>4</sub> HexNAC <sub>4</sub> Fuc <sub>1</sub> Neu5Ac <sub>1</sub> | FS | 6.40  |
| 639.572  | 639.575  | 4.4  | Hex <sub>4</sub> HexNAC <sub>4</sub> Fuc <sub>1</sub> Neu5Ac <sub>1</sub> | FS | 6.82  |
| 958.854  | 958.860  | 5.7  | Hex <sub>4</sub> HexNAC <sub>4</sub> Fuc <sub>1</sub> Neu5Ac <sub>1</sub> | FS | 7.06  |
| 958.854  | 958.847  | -7.2 | Hex <sub>4</sub> HexNAC <sub>4</sub> Fuc <sub>1</sub> Neu5Ac <sub>1</sub> | FS | 7.97  |
| 958.854  | 958.8531 | -1.1 | Hex <sub>4</sub> HexNAC <sub>4</sub> Fuc <sub>1</sub> Neu5Ac <sub>1</sub> | FS | 8.66  |
| 958.854  | 958.854  | -0.2 | Hex <sub>4</sub> HexNAC <sub>4</sub> Fuc <sub>1</sub> Neu5Ac <sub>1</sub> | FS | 8.95  |
| 958.854  | 958.861  | 6.8  | Hex <sub>4</sub> HexNAC <sub>4</sub> Fuc <sub>1</sub> Neu5Ac <sub>1</sub> | FS | 10.00 |
| 1060.394 | 1060.389 | -4.3 | Hex <sub>4</sub> HexNAC <sub>3</sub> Fuc <sub>1</sub> Neu5Ac <sub>1</sub> | FS | 6.39  |
| 1060.394 | 1060.393 | -0.6 | Hex <sub>4</sub> HexNAC <sub>3</sub> Fuc <sub>1</sub> Neu5Ac <sub>1</sub> | FS | 6.66  |
| 1060.394 | 1060.400 | 6.0  | Hex <sub>4</sub> HexNAC <sub>3</sub> Fuc <sub>1</sub> Neu5Ac <sub>1</sub> | FS | 7.03  |
| 1060.394 | 1060.389 | -4.8 | Hex <sub>4</sub> HexNAC <sub>3</sub> Fuc <sub>1</sub> Neu5Ac <sub>1</sub> | FS | 7.93  |

|          |          |       |                                                                           |    |       |
|----------|----------|-------|---------------------------------------------------------------------------|----|-------|
| 707.265  | 707.271  | 8.6   | Hex <sub>4</sub> HexNAc <sub>5</sub> Fuc <sub>1</sub> Neu5Ac <sub>1</sub> | FS | 8.15  |
| 707.265  | 707.271  | 7.6   | Hex <sub>4</sub> HexNAc <sub>5</sub> Fuc <sub>1</sub> Neu5Ac <sub>1</sub> | FS | 8.63  |
| 1133.423 | 1133.413 | -9.1  | Hex <sub>4</sub> HexNAc <sub>5</sub> Fuc <sub>2</sub> Neu5Ac <sub>1</sub> | FS | 7.84  |
| 755.951  | 755.946  | -6.7  | Hex <sub>4</sub> HexNAc <sub>5</sub> Fuc <sub>2</sub> Neu5Ac <sub>1</sub> | FS | 8.52  |
| 1133.423 | 1133.425 | 1.9   | Hex <sub>4</sub> HexNAc <sub>5</sub> Fuc <sub>2</sub> Neu5Ac <sub>1</sub> | FS | 10.58 |
| 774.958  | 774.957  | -1.8  | Hex <sub>4</sub> HexNAc <sub>6</sub> Fuc <sub>1</sub> Neu5Ac <sub>1</sub> | FS | 6.56  |
| 774.958  | 774.961  | 3.9   | Hex <sub>4</sub> HexNAc <sub>6</sub> Fuc <sub>1</sub> Neu5Ac <sub>1</sub> | FS | 6.79  |
| 774.958  | 774.957  | -1.5  | Hex <sub>4</sub> HexNAc <sub>6</sub> Fuc <sub>1</sub> Neu5Ac <sub>1</sub> | FS | 7.20  |
| 1161.934 | 1161.933 | -0.4  | Hex <sub>4</sub> HexNAc <sub>6</sub> Fuc <sub>1</sub> Neu5Ac <sub>1</sub> | FS | 7.43  |
| 774.958  | 774.952  | -8.1  | Hex <sub>4</sub> HexNAc <sub>6</sub> Fuc <sub>1</sub> Neu5Ac <sub>1</sub> | FS | 8.26  |
| 938.341  | 938.339  | -1.7  | Hex <sub>5</sub> HexNAc <sub>3</sub> Fuc <sub>1</sub> Neu5Ac <sub>1</sub> | FS | 7.57  |
| 938.341  | 938.337  | -3.8  | Hex <sub>5</sub> HexNAc <sub>3</sub> Fuc <sub>1</sub> Neu5Ac <sub>1</sub> | FS | 8.41  |
| 1039.881 | 1039.878 | -2.0  | Hex <sub>5</sub> HexNAc <sub>4</sub> Fuc <sub>1</sub> Neu5Ac <sub>1</sub> | FS | 8.30  |
| 1039.881 | 1039.880 | -0.4  | Hex <sub>5</sub> HexNAc <sub>4</sub> Fuc <sub>1</sub> Neu5Ac <sub>1</sub> | FS | 8.91  |
| 1039.881 | 1039.878 | -2.6  | Hex <sub>5</sub> HexNAc <sub>4</sub> Fuc <sub>1</sub> Neu5Ac <sub>1</sub> | FS | 9.29  |
| 1039.881 | 1039.882 | 1.0   | Hex <sub>5</sub> HexNAc <sub>4</sub> Fuc <sub>1</sub> Neu5Ac <sub>1</sub> | FS | 10.30 |
| 1141.420 | 1141.429 | 7.9   | Hex <sub>5</sub> HexNAc <sub>5</sub> Fuc <sub>1</sub> Neu5Ac <sub>1</sub> | FS | 5.68  |
| 761.283  | 761.290  | 9.0   | Hex <sub>5</sub> HexNAc <sub>5</sub> Fuc <sub>1</sub> Neu5Ac <sub>1</sub> | FS | 5.99  |
| 761.283  | 761.288  | 6.2   | Hex <sub>5</sub> HexNAc <sub>5</sub> Fuc <sub>1</sub> Neu5Ac <sub>1</sub> | FS | 6.68  |
| 761.283  | 761.289  | 8.8   | Hex <sub>5</sub> HexNAc <sub>5</sub> Fuc <sub>1</sub> Neu5Ac <sub>1</sub> | FS | 6.96  |
| 761.283  | 761.281  | -3.0  | Hex <sub>5</sub> HexNAc <sub>5</sub> Fuc <sub>1</sub> Neu5Ac <sub>1</sub> | FS | 7.86  |
| 761.283  | 761.283  | 0.2   | Hex <sub>5</sub> HexNAc <sub>5</sub> Fuc <sub>1</sub> Neu5Ac <sub>1</sub> | FS | 8.15  |
| 1141.420 | 1141.418 | -1.7  | Hex <sub>5</sub> HexNAc <sub>5</sub> Fuc <sub>1</sub> Neu5Ac <sub>1</sub> | FS | 9.69  |
| 858.315  | 858.314  | -0.4  | Hex <sub>5</sub> HexNAc <sub>5</sub> Fuc <sub>1</sub> Neu5Ac <sub>2</sub> | FS | 9.77  |
| 858.315  | 858.317  | 3.1   | Hex <sub>5</sub> HexNAc <sub>5</sub> Fuc <sub>1</sub> Neu5Ac <sub>2</sub> | FS | 11.21 |
| 809.969  | 809.967  | -2.2  | Hex <sub>5</sub> HexNAc <sub>5</sub> Fuc <sub>2</sub> Neu5Ac <sub>1</sub> | FS | 6.52  |
| 809.969  | 809.970  | 1.9   | Hex <sub>5</sub> HexNAc <sub>5</sub> Fuc <sub>2</sub> Neu5Ac <sub>1</sub> | FS | 6.83  |
| 809.969  | 809.962  | -8.8  | Hex <sub>5</sub> HexNAc <sub>5</sub> Fuc <sub>2</sub> Neu5Ac <sub>1</sub> | FS | 7.86  |
| 809.969  | 809.966  | -3.6  | Hex <sub>5</sub> HexNAc <sub>5</sub> Fuc <sub>2</sub> Neu5Ac <sub>1</sub> | FS | 8.05  |
| 809.969  | 809.962  | -8.4  | Hex <sub>5</sub> HexNAc <sub>5</sub> Fuc <sub>2</sub> Neu5Ac <sub>1</sub> | FS | 8.50  |
| 1214.449 | 1214.440 | -7.4  | Hex <sub>5</sub> HexNAc <sub>5</sub> Fuc <sub>2</sub> Neu5Ac <sub>1</sub> | FS | 8.70  |
| 858.655  | 858.654  | -0.8  | Hex <sub>5</sub> HexNAc <sub>5</sub> Fuc <sub>3</sub> Neu5Ac <sub>1</sub> | FS | 7.51  |
| 858.655  | 858.648  | -8.0  | Hex <sub>5</sub> HexNAc <sub>5</sub> Fuc <sub>3</sub> Neu5Ac <sub>1</sub> | FS | 7.75  |
| 1287.478 | 1287.469 | -7.3  | Hex <sub>5</sub> HexNAc <sub>5</sub> Fuc <sub>3</sub> Neu5Ac <sub>1</sub> | FS | 7.96  |
| 858.655  | 858.646  | -10.0 | Hex <sub>5</sub> HexNAc <sub>5</sub> Fuc <sub>3</sub> Neu5Ac <sub>1</sub> | FS | 10.72 |
| 828.976  | 828.979  | 4.2   | Hex <sub>5</sub> HexNAc <sub>6</sub> Fuc <sub>1</sub> Neu5Ac <sub>1</sub> | FS | 6.99  |
| 828.976  | 828.975  | -1.1  | Hex <sub>5</sub> HexNAc <sub>6</sub> Fuc <sub>1</sub> Neu5Ac <sub>1</sub> | FS | 7.21  |
| 828.976  | 828.975  | -1.7  | Hex <sub>5</sub> HexNAc <sub>6</sub> Fuc <sub>1</sub> Neu5Ac <sub>1</sub> | FS | 7.47  |
| 828.976  | 828.971  | -6.2  | Hex <sub>5</sub> HexNAc <sub>6</sub> Fuc <sub>1</sub> Neu5Ac <sub>1</sub> | FS | 8.37  |
| 828.976  | 828.974  | -2.8  | Hex <sub>5</sub> HexNAc <sub>6</sub> Fuc <sub>1</sub> Neu5Ac <sub>1</sub> | FS | 8.70  |

|          |          |      |                                                                           |    |       |
|----------|----------|------|---------------------------------------------------------------------------|----|-------|
| 926.008  | 926.007  | -1.3 | Hex <sub>5</sub> HexNAc <sub>6</sub> Fuc <sub>1</sub> Neu5Ac <sub>2</sub> | FS | 10.01 |
| 926.008  | 926.002  | -6.7 | Hex <sub>5</sub> HexNAc <sub>6</sub> Fuc <sub>1</sub> Neu5Ac <sub>2</sub> | FS | 11.39 |
| 877.662  | 877.665  | 3.0  | Hex <sub>5</sub> HexNAc <sub>6</sub> Fuc <sub>2</sub> Neu5Ac <sub>1</sub> | FS | 6.86  |
| 1315.989 | 1315.984 | -3.6 | Hex <sub>5</sub> HexNAc <sub>6</sub> Fuc <sub>2</sub> Neu5Ac <sub>1</sub> | FS | 7.28  |
| 1315.989 | 1315.979 | -7.4 | Hex <sub>5</sub> HexNAc <sub>6</sub> Fuc <sub>2</sub> Neu5Ac <sub>1</sub> | FS | 7.60  |
| 877.662  | 877.658  | -5.0 | Hex <sub>5</sub> HexNAc <sub>6</sub> Fuc <sub>2</sub> Neu5Ac <sub>1</sub> | FS | 8.33  |
| 896.669  | 896.674  | 5.8  | Hex <sub>5</sub> HexNAc <sub>7</sub> Fuc <sub>1</sub> Neu5Ac <sub>1</sub> | FS | 7.02  |
| 896.669  | 896.662  | -8.0 | Hex <sub>5</sub> HexNAc <sub>7</sub> Fuc <sub>1</sub> Neu5Ac <sub>1</sub> | FS | 7.61  |
| 896.669  | 896.667  | -2.5 | Hex <sub>5</sub> HexNAc <sub>7</sub> Fuc <sub>1</sub> Neu5Ac <sub>1</sub> | FS | 8.96  |
| 961.018  | 961.014  | -4.4 | Hex <sub>6</sub> HexNAc <sub>5</sub> Fuc <sub>2</sub> Neu5Ac <sub>2</sub> | FS | 9.51  |
| 961.018  | 961.016  | -2.3 | Hex <sub>6</sub> HexNAc <sub>5</sub> Fuc <sub>2</sub> Neu5Ac <sub>2</sub> | FS | 10.21 |
| 961.018  | 961.015  | -3.4 | Hex <sub>6</sub> HexNAc <sub>5</sub> Fuc <sub>2</sub> Neu5Ac <sub>2</sub> | FS | 10.80 |
| 882.994  | 882.992  | -1.9 | Hex <sub>6</sub> HexNAc <sub>6</sub> Fuc <sub>1</sub> Neu5Ac <sub>1</sub> | FS | 7.21  |
| 882.994  | 882.992  | -1.5 | Hex <sub>6</sub> HexNAc <sub>6</sub> Fuc <sub>1</sub> Neu5Ac <sub>1</sub> | FS | 7.42  |
| 882.994  | 882.992  | -2.2 | Hex <sub>6</sub> HexNAc <sub>6</sub> Fuc <sub>1</sub> Neu5Ac <sub>1</sub> | FS | 8.31  |
| 882.994  | 882.991  | -2.4 | Hex <sub>6</sub> HexNAc <sub>6</sub> Fuc <sub>1</sub> Neu5Ac <sub>1</sub> | FS | 8.57  |
| 882.994  | 882.992  | -2.1 | Hex <sub>6</sub> HexNAc <sub>6</sub> Fuc <sub>1</sub> Neu5Ac <sub>1</sub> | FS | 9.61  |
| 980.025  | 980.025  | -0.6 | Hex <sub>6</sub> HexNAc <sub>6</sub> Fuc <sub>1</sub> Neu5Ac <sub>2</sub> | FS | 10.06 |
| 980.025  | 980.022  | -2.9 | Hex <sub>6</sub> HexNAc <sub>6</sub> Fuc <sub>1</sub> Neu5Ac <sub>2</sub> | FS | 11.20 |
| 980.025  | 980.021  | -4.8 | Hex <sub>6</sub> HexNAc <sub>6</sub> Fuc <sub>1</sub> Neu5Ac <sub>2</sub> | FS | 13.31 |
| 931.679  | 931.683  | 3.6  | Hex <sub>6</sub> HexNAc <sub>6</sub> Fuc <sub>2</sub> Neu5Ac <sub>1</sub> | FS | 6.85  |
| 931.679  | 931.680  | 0.4  | Hex <sub>6</sub> HexNAc <sub>6</sub> Fuc <sub>2</sub> Neu5Ac <sub>1</sub> | FS | 7.11  |
| 931.679  | 931.677  | -3.1 | Hex <sub>6</sub> HexNAc <sub>6</sub> Fuc <sub>2</sub> Neu5Ac <sub>1</sub> | FS | 7.56  |
| 931.679  | 931.674  | -6.1 | Hex <sub>6</sub> HexNAc <sub>6</sub> Fuc <sub>2</sub> Neu5Ac <sub>1</sub> | FS | 8.21  |
| 931.679  | 931.677  | -3.0 | Hex <sub>6</sub> HexNAc <sub>6</sub> Fuc <sub>2</sub> Neu5Ac <sub>1</sub> | FS | 8.47  |
| 931.679  | 931.672  | -7.8 | Hex <sub>6</sub> HexNAc <sub>6</sub> Fuc <sub>2</sub> Neu5Ac <sub>1</sub> | FS | 10.44 |
| 1028.711 | 1028.708 | -3.6 | Hex <sub>6</sub> HexNAc <sub>6</sub> Fuc <sub>2</sub> Neu5Ac <sub>2</sub> | FS | 9.58  |
| 1028.711 | 1028.710 | -1.4 | Hex <sub>6</sub> HexNAc <sub>6</sub> Fuc <sub>2</sub> Neu5Ac <sub>2</sub> | FS | 10.91 |
| 980.365  | 980.367  | 1.7  | Hex <sub>6</sub> HexNAc <sub>6</sub> Fuc <sub>3</sub> Neu5Ac <sub>1</sub> | FS | 6.63  |
| 980.365  | 980.366  | 0.6  | Hex <sub>6</sub> HexNAc <sub>6</sub> Fuc <sub>3</sub> Neu5Ac <sub>1</sub> | FS | 8.21  |
| 980.365  | 980.363  | -2.2 | Hex <sub>6</sub> HexNAc <sub>6</sub> Fuc <sub>3</sub> Neu5Ac <sub>1</sub> | FS | 8.44  |
| 950.687  | 950.684  | -2.9 | Hex <sub>6</sub> HexNAc <sub>7</sub> Fuc <sub>1</sub> Neu5Ac <sub>1</sub> | FS | 7.35  |
| 950.687  | 950.681  | -5.7 | Hex <sub>6</sub> HexNAc <sub>7</sub> Fuc <sub>1</sub> Neu5Ac <sub>1</sub> | FS | 8.42  |
| 950.687  | 950.686  | -0.8 | Hex <sub>6</sub> HexNAc <sub>7</sub> Fuc <sub>1</sub> Neu5Ac <sub>1</sub> | FS | 10.50 |
| 999.373  | 999.365  | -7.2 | Hex <sub>6</sub> HexNAc <sub>7</sub> Fuc <sub>2</sub> Neu5Ac <sub>1</sub> | FS | 7.80  |
| 999.373  | 999.372  | -1.0 | Hex <sub>6</sub> HexNAc <sub>7</sub> Fuc <sub>2</sub> Neu5Ac <sub>1</sub> | FS | 7.98  |
| 999.373  | 999.370  | -2.8 | Hex <sub>6</sub> HexNAc <sub>7</sub> Fuc <sub>2</sub> Neu5Ac <sub>1</sub> | FS | 8.44  |
| 999.373  | 999.372  | -0.8 | Hex <sub>6</sub> HexNAc <sub>7</sub> Fuc <sub>2</sub> Neu5Ac <sub>1</sub> | FS | 9.91  |
| 1004.704 | 1004.700 | -3.8 | Hex <sub>7</sub> HexNAc <sub>7</sub> Fuc <sub>1</sub> Neu5Ac <sub>1</sub> | FS | 7.52  |
| 1004.704 | 1004.700 | -4.0 | Hex <sub>7</sub> HexNAc <sub>7</sub> Fuc <sub>1</sub> Neu5Ac <sub>1</sub> | FS | 8.56  |



|          |          |       |                                                                           |    |       |
|----------|----------|-------|---------------------------------------------------------------------------|----|-------|
| 1004.704 | 1004.703 | -1.4  | Hex <sub>7</sub> HexNAC <sub>7</sub> Fuc <sub>1</sub> Neu5Ac <sub>1</sub> | FS | 10.67 |
| 1101.736 | 1101.734 | -1.8  | Hex <sub>7</sub> HexNAC <sub>7</sub> Fuc <sub>1</sub> Neu5Ac <sub>2</sub> | FS | 11.03 |
| 1101.736 | 1101.734 | -1.9  | Hex <sub>7</sub> HexNAC <sub>7</sub> Fuc <sub>1</sub> Neu5Ac <sub>2</sub> | FS | 13.48 |
| 1053.390 | 1053.383 | -6.6  | Hex <sub>7</sub> HexNAC <sub>7</sub> Fuc <sub>2</sub> Neu5Ac <sub>1</sub> | FS | 8.08  |
| 1053.390 | 1053.390 | -0.7  | Hex <sub>7</sub> HexNAC <sub>7</sub> Fuc <sub>2</sub> Neu5Ac <sub>1</sub> | FS | 8.60  |
| 1053.390 | 1053.392 | 1.8   | Hex <sub>7</sub> HexNAC <sub>7</sub> Fuc <sub>2</sub> Neu5Ac <sub>1</sub> | FS | 9.38  |
| 1053.390 | 1053.388 | -2.5  | Hex <sub>7</sub> HexNAC <sub>7</sub> Fuc <sub>2</sub> Neu5Ac <sub>1</sub> | FS | 9.92  |
| 1102.076 | 1102.074 | -2.2  | Hex <sub>7</sub> HexNAC <sub>7</sub> Fuc <sub>3</sub> Neu5Ac <sub>1</sub> | FS | 9.39  |
| 1102.076 | 1102.074 | -2.0  | Hex <sub>7</sub> HexNAC <sub>7</sub> Fuc <sub>3</sub> Neu5Ac <sub>1</sub> | FS | 10.03 |
| 784.286  | 784.286  | 0.7   | Hex <sub>4</sub> HexNAC <sub>3</sub> Neu5Ac <sub>1</sub>                  | S  | 7.21  |
| 784.286  | 784.285  | -0.9  | Hex <sub>4</sub> HexNAC <sub>3</sub> Neu5Ac <sub>1</sub>                  | S  | 7.45  |
| 784.286  | 784.286  | 0.1   | Hex <sub>4</sub> HexNAC <sub>3</sub> Neu5Ac <sub>1</sub>                  | S  | 8.04  |
| 784.286  | 784.284  | -2.3  | Hex <sub>4</sub> HexNAC <sub>3</sub> Neu5Ac <sub>1</sub>                  | S  | 8.21  |
| 784.286  | 784.291  | 6.5   | Hex <sub>4</sub> HexNAC <sub>3</sub> Neu5Ac <sub>1</sub>                  | S  | 9.37  |
| 885.825  | 885.828  | 2.6   | Hex <sub>4</sub> HexNAC <sub>4</sub> Neu5Ac <sub>1</sub>                  | S  | 5.08  |
| 885.825  | 885.822  | -3.4  | Hex <sub>4</sub> HexNAC <sub>4</sub> Neu5Ac <sub>1</sub>                  | S  | 5.85  |
| 885.825  | 885.823  | -2.8  | Hex <sub>4</sub> HexNAC <sub>4</sub> Neu5Ac <sub>1</sub>                  | S  | 6.61  |
| 885.825  | 885.828  | 3.1   | Hex <sub>4</sub> HexNAC <sub>4</sub> Neu5Ac <sub>1</sub>                  | S  | 6.93  |
| 885.825  | 885.819  | -6.8  | Hex <sub>4</sub> HexNAC <sub>4</sub> Neu5Ac <sub>1</sub>                  | S  | 7.66  |
| 885.825  | 885.824  | -1.9  | Hex <sub>4</sub> HexNAC <sub>4</sub> Neu5Ac <sub>1</sub>                  | S  | 8.38  |
| 987.365  | 987.367  | 2.4   | Hex <sub>4</sub> HexNAC <sub>5</sub> Neu5Ac <sub>1</sub>                  | S  | 5.56  |
| 987.365  | 987.363  | -1.9  | Hex <sub>4</sub> HexNAC <sub>5</sub> Neu5Ac <sub>1</sub>                  | S  | 5.83  |
| 987.365  | 987.363  | -1.7  | Hex <sub>4</sub> HexNAC <sub>5</sub> Neu5Ac <sub>1</sub>                  | S  | 6.15  |
| 658.579  | 658.576  | -5.6  | Hex <sub>4</sub> HexNAC <sub>5</sub> Neu5Ac <sub>1</sub>                  | S  | 6.41  |
| 987.365  | 987.367  | 2.3   | Hex <sub>4</sub> HexNAC <sub>5</sub> Neu5Ac <sub>1</sub>                  | S  | 6.74  |
| 987.365  | 987.372  | 7.6   | Hex <sub>4</sub> HexNAC <sub>5</sub> Neu5Ac <sub>1</sub>                  | S  | 7.02  |
| 865.312  | 865.315  | 3.6   | Hex <sub>5</sub> HexNAC <sub>3</sub> Neu5Ac <sub>1</sub>                  | S  | 6.69  |
| 865.312  | 865.319  | 8.4   | Hex <sub>5</sub> HexNAC <sub>3</sub> Neu5Ac <sub>1</sub>                  | S  | 7.13  |
| 865.312  | 865.313  | 0.7   | Hex <sub>5</sub> HexNAC <sub>3</sub> Neu5Ac <sub>1</sub>                  | S  | 7.39  |
| 865.312  | 865.311  | -0.8  | Hex <sub>5</sub> HexNAC <sub>3</sub> Neu5Ac <sub>1</sub>                  | S  | 8.02  |
| 865.312  | 865.318  | 6.7   | Hex <sub>5</sub> HexNAC <sub>3</sub> Neu5Ac <sub>1</sub>                  | S  | 8.47  |
| 966.852  | 966.861  | 9.8   | Hex <sub>5</sub> HexNAC <sub>4</sub> Neu5Ac <sub>1</sub>                  | S  | 6.05  |
| 966.852  | 966.852  | 0.5   | Hex <sub>5</sub> HexNAC <sub>4</sub> Neu5Ac <sub>1</sub>                  | S  | 7.43  |
| 966.852  | 966.840  | -11.6 | Hex <sub>5</sub> HexNAC <sub>4</sub> Neu5Ac <sub>1</sub>                  | S  | 7.77  |
| 966.852  | 966.846  | -5.6  | Hex <sub>5</sub> HexNAC <sub>4</sub> Neu5Ac <sub>1</sub>                  | S  | 8.27  |
| 966.852  | 966.850  | -2.1  | Hex <sub>5</sub> HexNAC <sub>4</sub> Neu5Ac <sub>1</sub>                  | S  | 9.35  |
| 1068.391 | 1068.398 | 6.2   | Hex <sub>5</sub> HexNAC <sub>5</sub> Neu5Ac <sub>1</sub>                  | S  | 5.60  |
| 1068.391 | 1068.400 | 8.5   | Hex <sub>5</sub> HexNAC <sub>5</sub> Neu5Ac <sub>1</sub>                  | S  | 5.83  |
| 712.597  | 712.596  | -0.9  | Hex <sub>5</sub> HexNAC <sub>5</sub> Neu5Ac <sub>1</sub>                  | S  | 6.19  |
| 1068.391 | 1068.396 | 4.8   | Hex <sub>5</sub> HexNAC <sub>5</sub> Neu5Ac <sub>1</sub>                  | S  | 6.68  |

|          |          |      |                                                          |    |      |
|----------|----------|------|----------------------------------------------------------|----|------|
| 712.597  | 712.602  | 7.4  | Hex <sub>5</sub> HexNAc <sub>5</sub> Neu5Ac <sub>1</sub> | S  | 6.96 |
| 1068.391 | 1068.392 | 0.6  | Hex <sub>5</sub> HexNAc <sub>5</sub> Neu5Ac <sub>1</sub> | S  | 8.08 |
| 809.629  | 809.633  | 5.2  | Hex <sub>5</sub> HexNAc <sub>5</sub> Neu5Ac <sub>2</sub> | S  | 4.15 |
| 809.629  | 809.627  | -1.5 | Hex <sub>5</sub> HexNAc <sub>5</sub> Neu5Ac <sub>2</sub> | S  | 8.84 |
| 809.629  | 809.628  | -0.5 | Hex <sub>5</sub> HexNAc <sub>5</sub> Neu5Ac <sub>2</sub> | S  | 9.75 |
| 946.338  | 946.339  | 1.1  | Hex <sub>6</sub> HexNAc <sub>3</sub> Neu5Ac <sub>1</sub> | S  | 7.17 |
| 946.338  | 946.332  | -6.6 | Hex <sub>6</sub> HexNAc <sub>3</sub> Neu5Ac <sub>1</sub> | S  | 7.96 |
| 946.338  | 946.346  | 8.1  | Hex <sub>6</sub> HexNAc <sub>3</sub> Neu5Ac <sub>1</sub> | S  | 9.76 |
| 911.336  | 911.336  | 0.7  | GlcNAc <sub>2</sub> Man <sub>3</sub>                     | HM | 4.20 |
| 911.336  | 911.336  | 0.7  | GlcNAc <sub>2</sub> Man <sub>3</sub>                     | HM | 4.38 |
| 911.336  | 911.335  | -0.5 | GlcNAc <sub>2</sub> Man <sub>3</sub>                     | HM | 4.71 |
| 911.336  | 911.337  | 1.0  | GlcNAc <sub>2</sub> Man <sub>3</sub>                     | HM | 5.07 |
| 911.336  | 911.336  | -0.1 | GlcNAc <sub>2</sub> Man <sub>3</sub>                     | HM | 5.40 |
| 911.336  | 911.335  | -1.2 | GlcNAc <sub>2</sub> Man <sub>3</sub>                     | HM | 6.41 |
| 911.336  | 911.340  | 4.3  | GlcNAc <sub>2</sub> Man <sub>3</sub>                     | HM | 6.71 |
| 911.336  | 911.331  | -5.5 | GlcNAc <sub>2</sub> Man <sub>3</sub>                     | HM | 7.94 |
| 1073.388 | 1073.389 | 0.3  | GlcNAc <sub>2</sub> Man <sub>4</sub>                     | HM | 4.20 |
| 1073.388 | 1073.388 | -0.8 | GlcNAc <sub>2</sub> Man <sub>4</sub>                     | HM | 4.38 |
| 1073.388 | 1073.388 | -0.8 | GlcNAc <sub>2</sub> Man <sub>4</sub>                     | HM | 4.71 |
| 1073.388 | 1073.389 | 0.7  | GlcNAc <sub>2</sub> Man <sub>4</sub>                     | HM | 5.07 |
| 1073.388 | 1073.393 | 4.1  | GlcNAc <sub>2</sub> Man <sub>4</sub>                     | HM | 5.63 |
| 1073.388 | 1073.388 | -0.7 | GlcNAc <sub>2</sub> Man <sub>4</sub>                     | HM | 6.42 |
| 618.225  | 618.225  | 1.4  | GlcNAc <sub>2</sub> Man <sub>5</sub>                     | HM | 4.21 |
| 618.225  | 618.225  | 0.5  | GlcNAc <sub>2</sub> Man <sub>5</sub>                     | HM | 4.37 |
| 618.225  | 618.224  | -0.4 | GlcNAc <sub>2</sub> Man <sub>5</sub>                     | HM | 4.71 |
| 618.225  | 618.225  | 0.8  | GlcNAc <sub>2</sub> Man <sub>5</sub>                     | HM | 5.07 |
| 1235.441 | 1235.440 | -1.3 | GlcNAc <sub>2</sub> Man <sub>5</sub>                     | HM | 5.50 |
| 1235.441 | 1235.440 | -1.1 | GlcNAc <sub>2</sub> Man <sub>5</sub>                     | HM | 6.42 |
| 1397.494 | 1397.494 | -0.2 | GlcNAc <sub>2</sub> Man <sub>6</sub>                     | HM | 4.13 |
| 699.251  | 699.251  | 0.6  | GlcNAc <sub>2</sub> Man <sub>6</sub>                     | HM | 4.21 |
| 699.251  | 699.250  | -0.9 | GlcNAc <sub>2</sub> Man <sub>6</sub>                     | HM | 4.37 |
| 699.251  | 699.251  | -0.2 | GlcNAc <sub>2</sub> Man <sub>6</sub>                     | HM | 4.75 |
| 1397.494 | 1397.494 | 0.3  | GlcNAc <sub>2</sub> Man <sub>6</sub>                     | HM | 5.07 |
| 1397.494 | 1397.491 | -2.3 | GlcNAc <sub>2</sub> Man <sub>6</sub>                     | HM | 5.44 |
| 699.251  | 699.256  | 6.9  | GlcNAc <sub>2</sub> Man <sub>6</sub>                     | HM | 6.17 |
| 780.277  | 780.278  | 0.6  | GlcNAc <sub>2</sub> Man <sub>7</sub>                     | HM | 4.20 |
| 780.277  | 780.276  | -1.2 | GlcNAc <sub>2</sub> Man <sub>7</sub>                     | HM | 4.71 |
| 780.277  | 780.278  | 0.3  | GlcNAc <sub>2</sub> Man <sub>7</sub>                     | HM | 5.08 |
| 1559.547 | 1559.539 | -4.8 | GlcNAc <sub>2</sub> Man <sub>7</sub>                     | HM | 6.13 |
| 861.304  | 861.304  | 0.0  | GlcNAc <sub>2</sub> Man <sub>8</sub>                     | HM | 4.20 |

|          |          |      |                                      |    |      |
|----------|----------|------|--------------------------------------|----|------|
| 1721.600 | 1721.604 | 2.7  | GlcNAc <sub>2</sub> Man <sub>8</sub> | HM | 4.43 |
| 861.304  | 861.303  | -1.4 | GlcNAc <sub>2</sub> Man <sub>8</sub> | HM | 4.72 |
| 861.304  | 861.303  | -0.8 | GlcNAc <sub>2</sub> Man <sub>8</sub> | HM | 5.10 |
| 861.304  | 861.306  | 2.7  | GlcNAc <sub>2</sub> Man <sub>8</sub> | HM | 5.65 |
| 942.330  | 942.331  | 0.7  | GlcNAc <sub>2</sub> Man <sub>9</sub> | HM | 4.11 |
| 942.330  | 942.327  | -3.4 | GlcNAc <sub>2</sub> Man <sub>9</sub> | HM | 4.47 |
| 942.330  | 942.328  | -2.3 | GlcNAc <sub>2</sub> Man <sub>9</sub> | HM | 4.68 |
| 942.330  | 942.329  | -0.9 | GlcNAc <sub>2</sub> Man <sub>9</sub> | HM | 5.09 |
| 942.330  | 942.328  | -1.8 | GlcNAc <sub>2</sub> Man <sub>9</sub> | HM | 5.87 |
| 942.330  | 942.332  | 2.0  | GlcNAc <sub>2</sub> Man <sub>9</sub> | HM | 6.50 |
